# Supplementary material
Source: Elsevier journal article supplement (https://www.sciencedirect.com/science/article/pii/S1885585717302682)
Supplement: mmc1 [file mmc1.pdf]

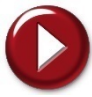

## Supplementary material

# Concomitant or Staged Transcatheter Treatment for Severe Combined Aortic and Mitral Valve Disease

### Table of the supplementary material.

#### Study Characteristics

| Author, Reference              | Year | Region         | Patients |
|--------------------------------|------|----------------|----------|
| Sürder et al. <sup>1</sup>     | 2011 | Switzerland    | 1        |
| Madder et al. <sup>2</sup>     | 2011 | EEUU           | 1        |
| Ong et al. <sup>3</sup>        | 2011 | Germany        | 2        |
| Barbanti et al. <sup>4</sup>   | 2011 | Italy          | 2        |
| Chan et al. <sup>5</sup>       | 2012 | United Kingdom | 1        |
| Puls et al. <sup>6</sup>       | 2013 | Germany        | 1        |
| Rudolph et al. <sup>7</sup>    | 2013 | Germany        | 11       |
| Settergren et al. <sup>8</sup> | 2013 | Sweden         | 1        |
| Wendeborn et al. <sup>9</sup>  | 2013 | Germany        | 1        |
| Kische et al. <sup>10</sup>    | 2013 | Germany        | 12       |

### REFERENCES

1. Sürder D, Altwegg L, Hurlimann D, Felix C, Grunenfelder J, Corti R. Percutaneous double valve intervention. *Eur Heart J*. 2011;32:636.
2. Madder RD, Safian RD, Gallagher M, Senter SR, Hanzel GS. The first report of transcatheter aortic valve implantation and percutaneous mitral valve repair in the same patient. *JACC Cardiovasc Interv*. 2011;4:824.

3. Ong SH, Beucher H, Mueller R, Gerckens U, Boekstegers P. Percutaneous double-valve interventions for aortic stenosis and pure mitral regurgitation. *Am J Cardiol.* 2011;108:893-895.
4. Barbanti M, Ussia GP, Tamburino C. Percutaneous treatment of aortic stenosis and mitral regurgitation in the same patient: First human cases description. *Catheter Cardiovasc Interv.* 2011;78:650-655.
5. Chan PH, Alegria-Barrero E, Patterson T, et al. Successful dual-valve transcatheter therapy for severe aortic stenosis and mitral regurgitation. *Int J Cardiol.* 2012;157:e35-e37.
6. Puls M, Seipelt R, Schillinger W. Complete interventional heart repair of multiple concomitant cardiac pathologies in a staged approach. *Catheter Cardiovasc Interv.* 2013;81:896-900.
7. Rudolph V, Schirmer J, Franzen O, et al. Bivalvular transcatheter treatment of high-surgical-risk patients with coexisting severe aortic stenosis and significant mitral regurgitation. *Int J Cardiol.* 2013;167:716-720.
8. Settergren M, Jacobsen P-H, Bäck M, Winter R. Mitral Valve Repair Using the MitraClip System in a Patient with Severe Mitral Regurgitation in the A3/P3 Region due to Chordae Rupture During Transapical TAVI. *Atlas of Percutaneous Edge-to-Edge Mitral Valve Repair: Springer; 2013.* p. 483-489.
9. Wendeborn J, Donndorf P, Westphal B, Steinhoff G. Surgical double valve replacement after transcatheter aortic valve implantation and interventional mitral valve repair. *Interact Cardiovasc Thorac Surg.* 2013;17:909-911.
10. Kische S, D'Ancona G, Paranskaya L, et al. Staged total percutaneous treatment of aortic valve pathology and mitral regurgitation: Institutional experience. *Catheter Cardiovasc Interv.* 2013;82:E552-E563.
